# Supplementary material for: Assessing the Impact of Cyclosporin A on Lentiviral Transduction and Preservation of Human Hematopoietic Stem Cells in Clinically Relevant Ex Vivo Gene Therapy Settings
Source: PubMed Central journal article supplement (PMC6761585; doi:10.1089/hum.2019.016), 2019-09-17
Supplement: Supp_FigS1.pdf [file Supp_FigS1.pdf]

## Supplementary Data

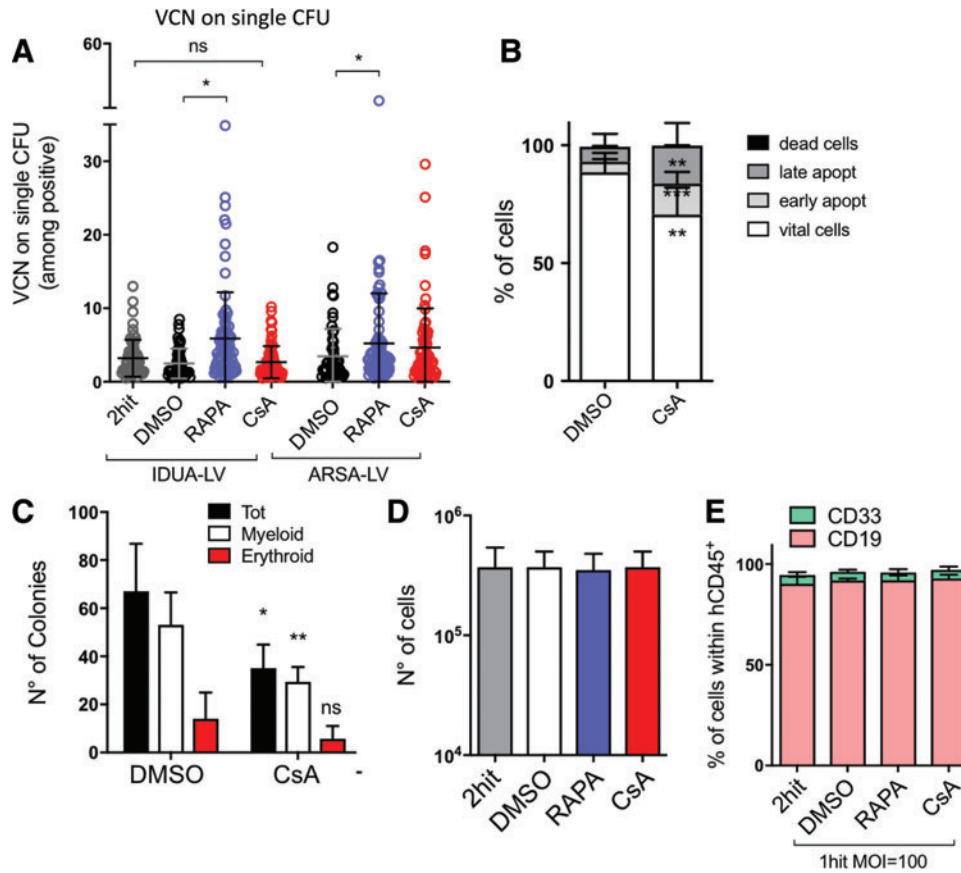

**Supplementary Figure S1.** (A) BM-derived CD34<sup>+</sup> cells were transduced with *IDUA*-LV, as reported in Fig. 1A. VCN/human genome were evaluated, picking single colonies after 15 days in culture ( $M \pm SD$ ,  $n \geq 50$ , Kruskal-Wallis with Dunn's multiple comparison test vs. each DMSO; ns, not significant;  $*p \leq 0.05$ ). (B and C) mPB-CD34<sup>+</sup> cells were transduced or not with a lab-grade PGK-*GFP* LV in the presence of DMSO/CsA, and apoptosis (B) or colonies count (C) were reported ( $M \pm SD$ ,  $n = 10$ , Mann-Whitney test vs. each DMSO,  $**p \leq 0.01$ ,  $***p \leq 0.001$ ). (D) BM-CD34<sup>+</sup> cells were counted at the time of transplantation in NSG mice, as reported in Fig. 1 for *IDUA*-LV. (E) Percentages of human B, T, and myeloid lineages within human cells were shown in the BM of mice from the experiments reported in Fig. 1 at 22 weeks post transplant.
