# Supplementary material for: Assessing the Impact of Cyclosporin A on Lentiviral Transduction and Preservation of Human Hematopoietic Stem Cells in Clinically Relevant Ex Vivo Gene Therapy Settings
Source: PubMed Central journal article supplement (PMC6761585; doi:10.1089/hum.2019.016), 2019-09-17
Supplement: Supp_FigS2-TableS1.pdf [file Supp_FigS2-TableS1.pdf]

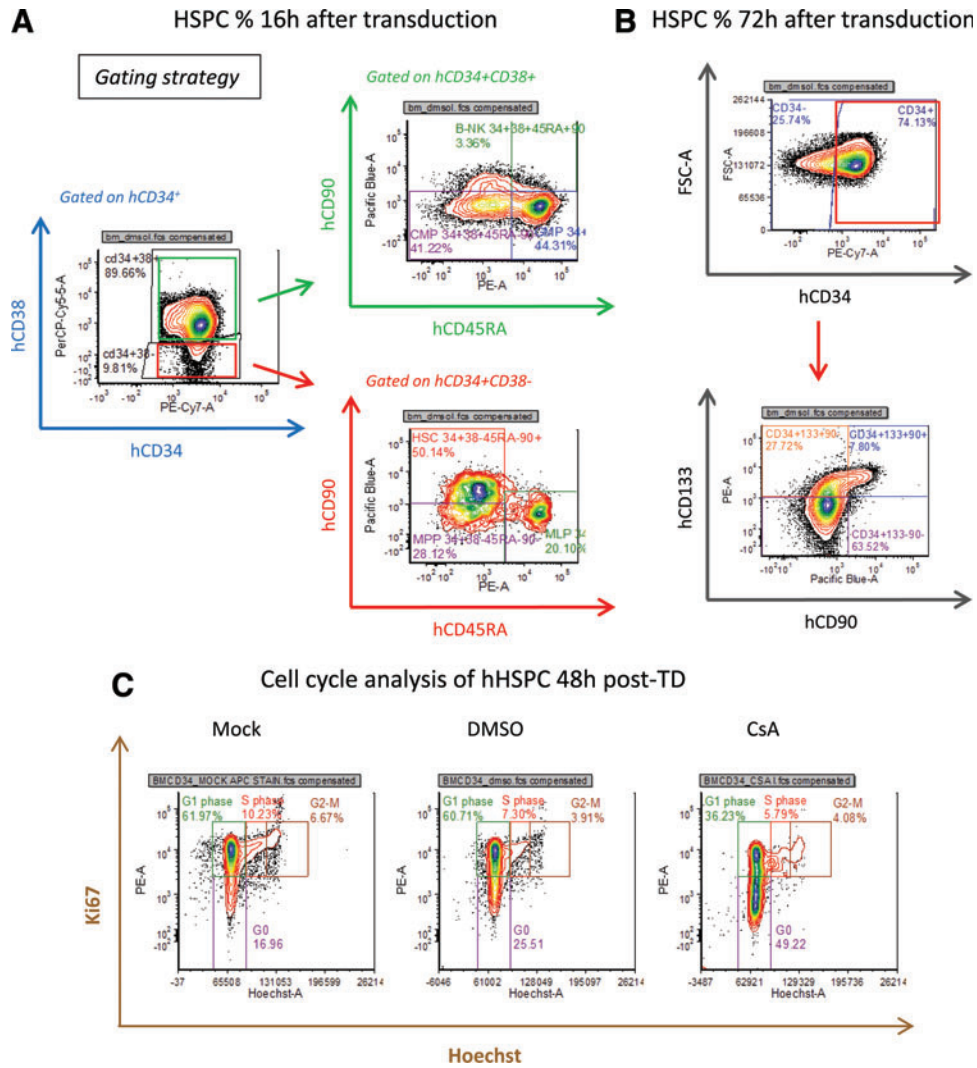

**Supplementary Figure S2.** The subpopulation composition of BM-derived CD34<sup>+</sup> HSPC was measured at **(A)** 16 and **(B)** 72 h post transduction using the reported gating strategies. **(C)** Gating strategy to measure the cell cycle in BM-derived CD34<sup>+</sup> HSPC 48 h post transduction.

**Supplementary Table S1.** PCR reactions for ddPCR

| Cycling step         | Temperature (°C) | Time     | Number of cycles |                     |
|----------------------|------------------|----------|------------------|---------------------|
| Enzyme activation    | 95               | 5 min    | 1                | ddPCR 200 or 300 nM |
| Denaturation         | 95               | 30 s     | 40               |                     |
| Annealing/extension  | 63               | 1 min    | 40               |                     |
| Signal stabilization | 4                | 5 min    | 1                |                     |
|                      | 90               | 5 min    | 1                |                     |
| Hold (optional)      | 4                | Infinite | 1                |                     |
