# Supplementary material for: Assessing the Impact of Cyclosporin A on Lentiviral Transduction and Preservation of Human Hematopoietic Stem Cells in Clinically Relevant Ex Vivo Gene Therapy Settings
Source: PubMed Central journal article supplement (PMC6761585; doi:10.1089/hum.2019.016), 2019-09-17
Supplement: Supp_TableS2-S3.pdf [file Supp_TableS2-S3.pdf]

**Supplementary Table S2. List of human antibodies used for flow cytometry**

| <i>Antibody</i>         | <i>Fluorochrome</i> | <i>Dilution</i> | <i>Clone</i> | <i>Company</i>  | <i>Code</i> |
|-------------------------|---------------------|-----------------|--------------|-----------------|-------------|
| hCD33                   | BV421               | 1:25            | WM53         | BD Biosciences  | 562854      |
| Anti-human FcR blocking |                     | 1:50            |              | Miltenyi Biotec | 120-000-442 |
| Mouse Fc block          |                     | 1:100           | 2.4G2        | BD Pharmigen    | 553142      |
| hCD45                   | APCh7               | 1:25            | 2D1          | BD Biosciences  | 641417      |
| hCD19                   | PE                  | 1:25            | SJ25C1       | BD Biosciences  | 345789      |
| hCD33                   | PeCy7               | 1:25            | P67.6        | BD Biosciences  | 333952      |
| hCD3                    | APC                 | 1:25            | UCHT1        | BD Biosciences  | 555335      |
| hCD13                   | BV                  | 1:25            | WM15         | BD Biosciences  | 562596      |
| hCD34                   | PeCy7               | 1:25            | 8G12         | BD Biosciences  | 348811      |
| hCD38                   | V450                | 1:25            | HB7          | BD Biosciences  | 646851      |
| hCD90                   | APC                 | 1:25            | 5E10         | BD Biosciences  | 559869      |
| hCD133/2                | PE                  | 1:25            | 293C3        | Miltenyi Biotec | 130-090-853 |
| hCD45RA                 | PE                  | 1:25            |              | Miltenyi Biotec | 130-092-248 |
| hKi67                   | PE                  | 1:10            | B56          | BD              | 51-36525X   |
| IgG1 isotype control    | PE                  | 1:10            | MOPC-21      | BD              | 51-35405X   |

**Supplementary Table S3. Summary of samples used for integration site analysis and number of integration sites retrieved for each sample**

| <i>Vector</i> | <i>Treatment</i> | <i>MOI</i> | <i>In vivo or in vitro</i> | <i>Sample ID</i> | <i>ng DNA analyzed</i> | <i>Number of IS</i> |
|---------------|------------------|------------|----------------------------|------------------|------------------------|---------------------|
| SINLV-GFP     | CsA              | 10         | <i>In vitro</i>            | CSA-CD34-CP-03   | 500                    | 1446                |
|               |                  |            | <i>In vivo</i>             | CSA-CP-07        | 167                    | 112                 |
|               |                  | 100        | <i>In vivo</i>             | CSA-DC-04        | 167                    | 267                 |
|               |                  |            | <i>In vivo</i>             | CSA-DC-05        | 167                    | 78                  |
|               |                  |            | <i>In vivo</i>             | CSA-DC-06        | 333                    | 172                 |
| IDUA-LV       | DMSO             | 100        | <i>In vivo</i>             | CSA-CP-19-I      | 333                    | 13                  |
|               |                  |            | <i>In vivo</i>             | CSA-CP20-I       | 500                    | 29                  |
| SINLV-GFP     | DMSO             | 10         | <i>In vitro</i>            | DMSO-CD34-CP-01  | 167                    | 291                 |
|               |                  |            | <i>In vivo</i>             | D-CP-04          | 167                    | 33                  |
|               |                  | 100        | <i>In vivo</i>             | D-DC-01          | 167                    | 121                 |
|               |                  |            | <i>In vivo</i>             | D-DC-02          | 333                    | 90                  |
|               |                  |            | <i>In vivo</i>             | D-DC-03          | 333                    | 82                  |
| IDUA-LV       | DMSO             | 100        | <i>In vivo</i>             | D-CP17-I         | 100                    | 18                  |
|               |                  |            | <i>In vivo</i>             | D-CP18-I         | 100                    | 10                  |

*in vitro*, integration sites were retrieved from *in vitro* cultured HSPC after transduction with the indicated vector (2 weeks in culture); *in vivo*, integration sites were retrieved from BM cells from transplanted mice at 17 weeks after transplant; ng DNA analyzed, PCR reactions were performed on variable amounts of DNA, depending on availability.
